# Supplementary material for: Hericium erinaceus Extract Exerts Beneficial Effects on Gut–Neuroinflammaging–Cognitive Axis in Elderly Mice
Source: MDPI journal article supplement (doi:10.3390/biology13010018), 2023-12-28
Supplement: s1 [file s1]

**Table 1.** Primary antibodies employed for microscopy experimental procedures.

| Primary antibodies | Antigen                                     | Immunogen                                                                                                                                          | Manufacturer, Species, Mono-Polyclonal, Catalogue or Lot No., RRID                                   | Diluted Used |
|--------------------|---------------------------------------------|----------------------------------------------------------------------------------------------------------------------------------------------------|------------------------------------------------------------------------------------------------------|--------------|
|                    | Anti-CD45                                   | Purified antibody raised against a carrier-protein conjugated synthetic peptide encompassing a sequence within the C-terminus region of human CD45 | GeneTex, Inc. (North America, USA), Rabbit polyclonal IgG, Cat# GTX116018, RRID: AB_10621655470      | 1:200        |
|                    | Anti-Interleukin-6 (M-19)                   | Purified antibody raised against a peptide mapping at the C-terminus of murine IL6                                                                 | Santa Cruz Biotechnology (Santa Cruz, CA, USA), Goat polyclonal IgG, Cat# sc-1265, RRID: AB_2127470  | 1:200        |
|                    | Anti-Glial fibrillary acidic protein (C-19) | Purified antibody raised against a peptide mapping at the C-terminus of GFAP of human origin                                                       | Santa Cruz Biotechnology (Santa Cruz, CA, USA), Rabbit polyclonal IgG, Cat# sc-6170, RRID: AB_641021 | 1:100        |
|                    | Anti-p62/SQSTM1                             | Recombinant full-length protein corresponding to Human SQSTM1/p62 aa 1-440                                                                         | Abcam (Cambridge, United States), Mouse monoclonal, Cat# ab56416, RRID: AB_945626                    | 1:100        |
|                    | Anti-Histone H2A.X (6L16)                   | Purified antibody raised against KLH-conjugated linear peptide corresponding to 9 amino acids surrounding phospho-serine 139 of human Histone H2AX | Merck KGaA (Darmstadt, Germany), Rabbit Monoclonal Antibody, Cat# ZRB05636, RRID: AB_309864.         | 1:100        |

**Table 2.** Secondary antibodies employed for microscopy experimental procedures.

|                         | Antigen                                                                                                       | Immunogen                                     | Manufacturer, Species,<br>Mono-Polyclonal,<br>Catalogue or Lot No.,<br>RRID              | Diluted<br>Used |
|-------------------------|---------------------------------------------------------------------------------------------------------------|-----------------------------------------------|------------------------------------------------------------------------------------------|-----------------|
| Secondary<br>antibodies | Biotinylated<br>goat anti-<br>rabbit IgG                                                                      | Gamma immunoglobulins                         | Vector Laboratories<br>(Burlingame, CA, USA),<br>Goat, lot# PK-6101, RRID:<br>AB_2336820 | 1:200           |
|                         | Alexa Fluor™<br>594 donkey<br>anti-goat IgG<br>(H + L) Highly<br>Cross-<br>Adsorbed<br>Secondary<br>Antibody  | Gamma Immunoglobins<br>Heavy and Light chains | Thermo Fisher Scientific<br>(Monza, Italy)                                               | 1:200           |
|                         | Alexa Fluor™<br>488 goat anti-<br>rabbit IgG (H +<br>L) Highly<br>Cross-<br>Adsorbed<br>Secondary<br>Antibody | Gamma Immunoglobins<br>Heavy and Light chains | Thermo Fisher Scientific<br>(Monza, Italy)                                               | 1:200           |
|                         |                                                                                                               |                                               |                                                                                          |                 |
