# Supplementary material for: Hericium erinaceus Extract Exerts Beneficial Effects on Gut–Neuroinflammaging–Cognitive Axis in Elderly Mice
Source: Biology (Basel). 2023 Dec 28;13(1):18. doi: 10.3390/biology13010018 (PMC10813749; doi:10.3390/biology13010018)
Supplement: Supplementary file 1 [file biology-13-00018-s001.zip]

Archive with 4 entries (4 files):
- Figure S1.pdf
- Figure S2.tif
- Figure S3.tif
- Tables S1 and S2.pdf
