# Supplementary figures and images for: Hericium erinaceus Extract Exerts Beneficial Effects on Gut–Neuroinflammaging–Cognitive Axis in Elderly Mice
Source: MDPI journal article supplement (doi:10.3390/biology13010018), 2023-12-28

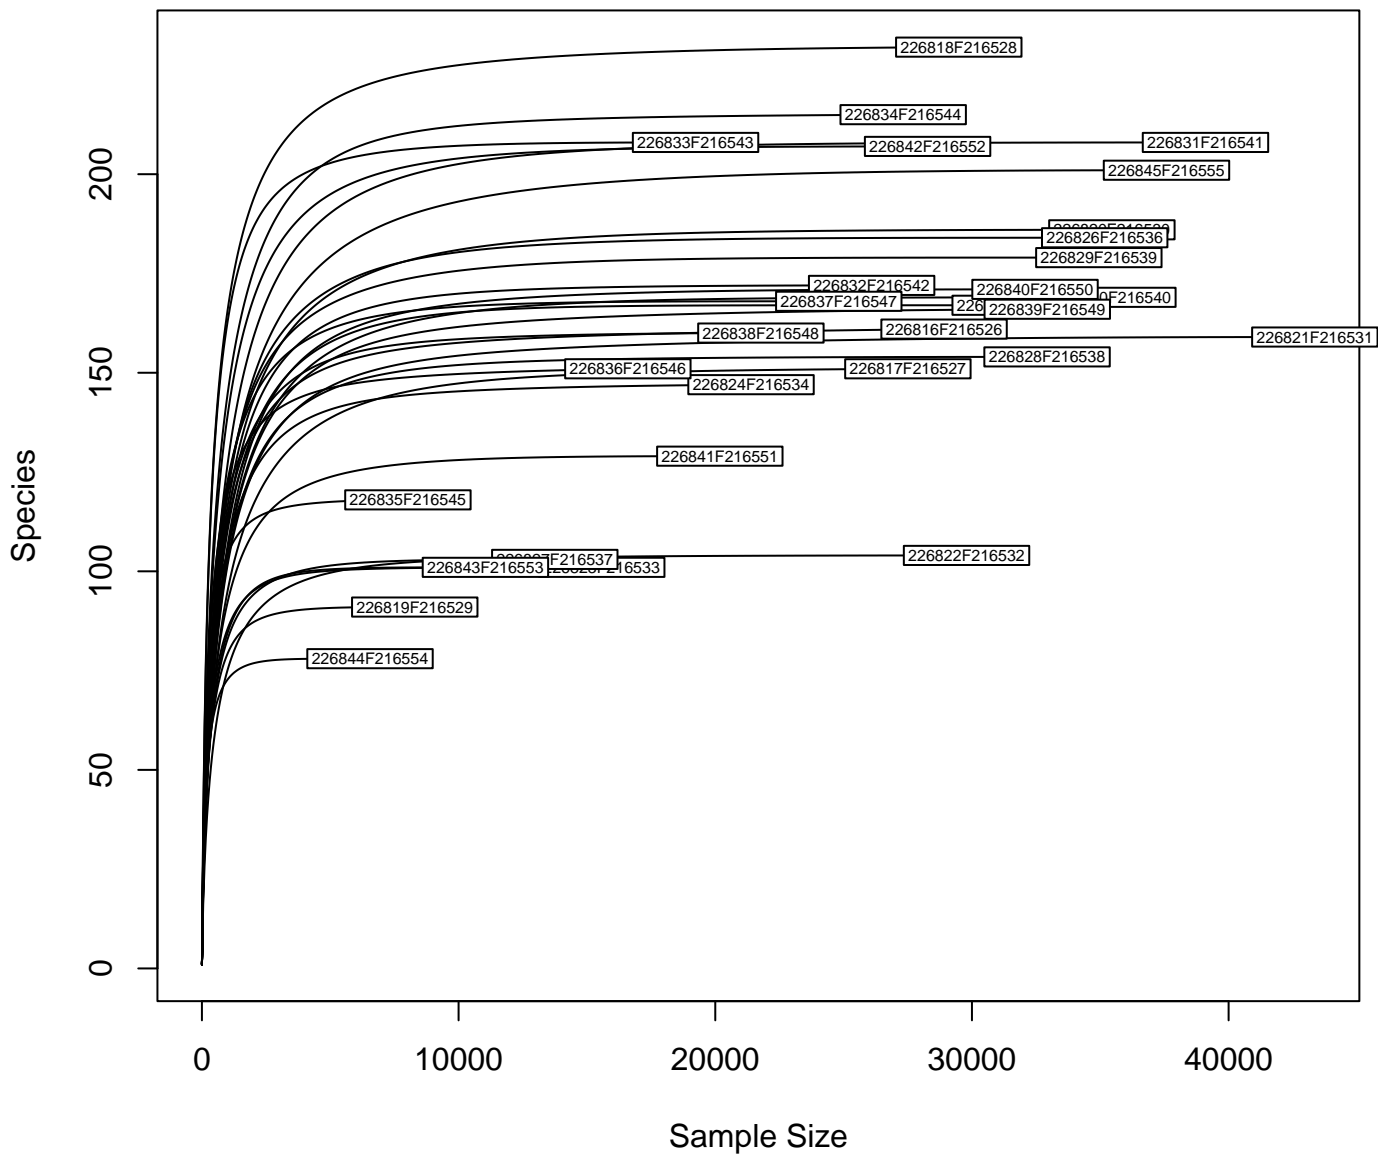

Supplement: s1 [file s1]
